# Supplementary material
Source: Springer Nature journal article supplement (https://rodin.uca.es/xmlui/bitstream/handle/10498/39497/11357_2026_2262_MOESM1_ESM.pdf)
Supplement: MOESM1 [file 11357_2026_2262_MOESM1_ESM.pdf]

## Online Resource 1 for:

### Associations of psychosocial factors with of cardiovascular health in aging: Insights from the Inlife-Aging Project.

#### Submitted to *GeroScience*

*Iván H. Martín-Costa, MSc, PhD(c)<sup>a\*</sup>; Laura Martínez-Sánchez, PhD<sup>a</sup>; Verónica Mihaiescu-Ion, BPT, PhD(c)<sup>b</sup>; Sonia Ortega-Gómez, PhD<sup>a</sup>; Javier S. Morales, PhD<sup>c,d,e</sup>; José L. Andrey-Guerrero, MD<sup>f,g</sup>; María J. Pedrosa-Martínez, MD<sup>h</sup>; Eulalio Valmisa, MD<sup>i</sup>; José D. Santotoribio, MD, PhD<sup>j</sup>; David Jiménez-Pavón, PhD<sup>a,k</sup>; Ana Carbonell-Baeza, PhD<sup>a,l</sup>.*

<sup>a</sup> MOVE-IT Research Group, Department of Physical Education, Instituto de Investigación e Innovación Biomédica de Cádiz (INiBICA), Faculty of Education Sciences, Universidad de Cádiz, Cádiz, Spain; <sup>b</sup> MOVE-IT Research Group, Department of Nursing and Physical Therapy, Instituto de Investigación e Innovación Biomédica de Cádiz (INiBICA), Faculty of Nursing and Physical Therapy, Universidad de Cádiz, Cádiz, Spain; <sup>c</sup> SPORT Research Group (CTS-1024) and CIBIS (Centro de Investigación para el Bienestar y la Inclusión Social), Universidad de Almería, Almería, Spain; <sup>d</sup> Biomedical Research Unit, Hospital Universitario Torrecárdenas, Almería, Spain; <sup>e</sup> Department of Education, Faculty of Education Sciences, Universidad de Almería, Almería, Spain; <sup>f</sup> Internal Medicine, Hospital Universitario Puerto Real, Cádiz, Spain; <sup>g</sup> Internal Medicine, Hospital de La Línea de la Concepción, Cádiz, Spain; <sup>h</sup> Clinical Pharmacology, Hospital Universitario Puerto Real, Cádiz, Spain; <sup>i</sup> Mental Health, Hospital Universitario Puerto Real, Cádiz, Spain; <sup>j</sup> Laboratory Medicine Department, Instituto de Investigación e Innovación Biomédica de Cádiz (INiBICA), Hospital Universitario Puerto Real, Cádiz, Spain; <sup>k</sup> CIBER of Frailty and Healthy Aging (CIBERFES), Madrid, Spain; <sup>l</sup> Healthy-Age Research Network: Active aging, exercise and health, Consejo Superior de Deportes (CSD), Ministry of Culture and Sport of Spain, Madrid, Spain.

\*Corresponding Author: [ivan.hoditx@uca.es](mailto:ivan.hoditx@uca.es) | Faculty of Education Sciences, University of Cádiz, Avda. República Saharaui s/n, Puerto Real Campus, 11519 Puerto Real (Cádiz), Spain

**Table S1** Definition, tools and scoring approach for quantifying Life's Essential 8 scores

| LE8 Domains       | LE8 Components                                                                                                                                                                                   | Method of Measurement                                                                                                                                                                                                                                                                                                                                                                                                                                                                    | Quantification                                                                                                                                                                                                                                                                                                                                                                                                                                                                                                                                                                           |         |          |      |                                         |         |                                          |          |                                          |         |                                          |         |                                                                       |        |   |   |
|-------------------|--------------------------------------------------------------------------------------------------------------------------------------------------------------------------------------------------|------------------------------------------------------------------------------------------------------------------------------------------------------------------------------------------------------------------------------------------------------------------------------------------------------------------------------------------------------------------------------------------------------------------------------------------------------------------------------------------|------------------------------------------------------------------------------------------------------------------------------------------------------------------------------------------------------------------------------------------------------------------------------------------------------------------------------------------------------------------------------------------------------------------------------------------------------------------------------------------------------------------------------------------------------------------------------------------|---------|----------|------|-----------------------------------------|---------|------------------------------------------|----------|------------------------------------------|---------|------------------------------------------|---------|-----------------------------------------------------------------------|--------|---|---|
| Health Behaviors  | Diet quality                                                                                                                                                                                     | <p><b>Measurement:</b><br/>Diet quality was summarized using the HEI-2020 [1].</p> <p><b>Tools:</b><br/>PREDIMED semi-quantitative FFQ [2, 3] and Spanish Food Composition Tables [4, 5].</p> <p>Daily consumption was estimated by multiplying the portion size by its frequency of intake using an ad hoc computer program specifically developed for this purpose [4, 6].</p>                                                                                                         | <p><b>Metric:</b> Quantiles of HEI-2020-style diet adherence.</p> <p><b>Scoring:</b></p> <table> <thead> <tr> <th>Points</th> <th>Quantile</th> </tr> </thead> <tbody> <tr> <td>100</td> <td>≥95<sup>th</sup> %ile (top/ideal diet)</td> </tr> <tr> <td>80</td> <td>75<sup>th</sup> - 94<sup>th</sup> %ile</td> </tr> <tr> <td>50</td> <td>50<sup>th</sup> - 74<sup>th</sup> %ile</td> </tr> <tr> <td>25</td> <td>25<sup>th</sup> - 49<sup>th</sup> %ile</td> </tr> <tr> <td>0</td> <td>1<sup>st</sup> - 24<sup>th</sup> %ile (bottom/least ideal quartile)</td> </tr> </tbody> </table> | Points  | Quantile | 100  | ≥95 <sup>th</sup> %ile (top/ideal diet) | 80      | 75 <sup>th</sup> - 94 <sup>th</sup> %ile | 50       | 50 <sup>th</sup> - 74 <sup>th</sup> %ile | 25      | 25 <sup>th</sup> - 49 <sup>th</sup> %ile | 0       | 1 <sup>st</sup> - 24 <sup>th</sup> %ile (bottom/least ideal quartile) |        |   |   |
|                   | Points                                                                                                                                                                                           | Quantile                                                                                                                                                                                                                                                                                                                                                                                                                                                                                 |                                                                                                                                                                                                                                                                                                                                                                                                                                                                                                                                                                                          |         |          |      |                                         |         |                                          |          |                                          |         |                                          |         |                                                                       |        |   |   |
| 100               | ≥95 <sup>th</sup> %ile (top/ideal diet)                                                                                                                                                          |                                                                                                                                                                                                                                                                                                                                                                                                                                                                                          |                                                                                                                                                                                                                                                                                                                                                                                                                                                                                                                                                                                          |         |          |      |                                         |         |                                          |          |                                          |         |                                          |         |                                                                       |        |   |   |
| 80                | 75 <sup>th</sup> - 94 <sup>th</sup> %ile                                                                                                                                                         |                                                                                                                                                                                                                                                                                                                                                                                                                                                                                          |                                                                                                                                                                                                                                                                                                                                                                                                                                                                                                                                                                                          |         |          |      |                                         |         |                                          |          |                                          |         |                                          |         |                                                                       |        |   |   |
| 50                | 50 <sup>th</sup> - 74 <sup>th</sup> %ile                                                                                                                                                         |                                                                                                                                                                                                                                                                                                                                                                                                                                                                                          |                                                                                                                                                                                                                                                                                                                                                                                                                                                                                                                                                                                          |         |          |      |                                         |         |                                          |          |                                          |         |                                          |         |                                                                       |        |   |   |
| 25                | 25 <sup>th</sup> - 49 <sup>th</sup> %ile                                                                                                                                                         |                                                                                                                                                                                                                                                                                                                                                                                                                                                                                          |                                                                                                                                                                                                                                                                                                                                                                                                                                                                                                                                                                                          |         |          |      |                                         |         |                                          |          |                                          |         |                                          |         |                                                                       |        |   |   |
| 0                 | 1 <sup>st</sup> - 24 <sup>th</sup> %ile (bottom/least ideal quartile)                                                                                                                            |                                                                                                                                                                                                                                                                                                                                                                                                                                                                                          |                                                                                                                                                                                                                                                                                                                                                                                                                                                                                                                                                                                          |         |          |      |                                         |         |                                          |          |                                          |         |                                          |         |                                                                       |        |   |   |
| Physical activity | <p><b>Measurement:</b><br/>Self-reported minutes of moderate or vigorous physical activity per week, obtained via interviewer-administered questionnaire.</p> <p><b>Tools:</b><br/>GPAQ [7].</p> | <p><b>Metric:</b> Minutes of moderate (or greater) intensity activity per week.</p> <p><b>Scoring:</b></p> <table> <thead> <tr> <th>Points</th> <th>Minutes</th> </tr> </thead> <tbody> <tr> <td>100</td> <td>≥150</td> </tr> <tr> <td>90</td> <td>120-149</td> </tr> <tr> <td>80</td> <td>90 - 119</td> </tr> <tr> <td>60</td> <td>60 - 89</td> </tr> <tr> <td>40</td> <td>30 - 59</td> </tr> <tr> <td>20</td> <td>1 - 29</td> </tr> <tr> <td>0</td> <td>0</td> </tr> </tbody> </table> | Points                                                                                                                                                                                                                                                                                                                                                                                                                                                                                                                                                                                   | Minutes | 100      | ≥150 | 90                                      | 120-149 | 80                                       | 90 - 119 | 60                                       | 60 - 89 | 40                                       | 30 - 59 | 20                                                                    | 1 - 29 | 0 | 0 |
| Points            | Minutes                                                                                                                                                                                          |                                                                                                                                                                                                                                                                                                                                                                                                                                                                                          |                                                                                                                                                                                                                                                                                                                                                                                                                                                                                                                                                                                          |         |          |      |                                         |         |                                          |          |                                          |         |                                          |         |                                                                       |        |   |   |
| 100               | ≥150                                                                                                                                                                                             |                                                                                                                                                                                                                                                                                                                                                                                                                                                                                          |                                                                                                                                                                                                                                                                                                                                                                                                                                                                                                                                                                                          |         |          |      |                                         |         |                                          |          |                                          |         |                                          |         |                                                                       |        |   |   |
| 90                | 120-149                                                                                                                                                                                          |                                                                                                                                                                                                                                                                                                                                                                                                                                                                                          |                                                                                                                                                                                                                                                                                                                                                                                                                                                                                                                                                                                          |         |          |      |                                         |         |                                          |          |                                          |         |                                          |         |                                                                       |        |   |   |
| 80                | 90 - 119                                                                                                                                                                                         |                                                                                                                                                                                                                                                                                                                                                                                                                                                                                          |                                                                                                                                                                                                                                                                                                                                                                                                                                                                                                                                                                                          |         |          |      |                                         |         |                                          |          |                                          |         |                                          |         |                                                                       |        |   |   |
| 60                | 60 - 89                                                                                                                                                                                          |                                                                                                                                                                                                                                                                                                                                                                                                                                                                                          |                                                                                                                                                                                                                                                                                                                                                                                                                                                                                                                                                                                          |         |          |      |                                         |         |                                          |          |                                          |         |                                          |         |                                                                       |        |   |   |
| 40                | 30 - 59                                                                                                                                                                                          |                                                                                                                                                                                                                                                                                                                                                                                                                                                                                          |                                                                                                                                                                                                                                                                                                                                                                                                                                                                                                                                                                                          |         |          |      |                                         |         |                                          |          |                                          |         |                                          |         |                                                                       |        |   |   |
| 20                | 1 - 29                                                                                                                                                                                           |                                                                                                                                                                                                                                                                                                                                                                                                                                                                                          |                                                                                                                                                                                                                                                                                                                                                                                                                                                                                                                                                                                          |         |          |      |                                         |         |                                          |          |                                          |         |                                          |         |                                                                       |        |   |   |
| 0                 | 0                                                                                                                                                                                                |                                                                                                                                                                                                                                                                                                                                                                                                                                                                                          |                                                                                                                                                                                                                                                                                                                                                                                                                                                                                                                                                                                          |         |          |      |                                         |         |                                          |          |                                          |         |                                          |         |                                                                       |        |   |   |

**Table S1** Definition, tools and scoring approach for quantifying Life's Essential 8 scores

| LE8 Domains | LE8 Components                 | Method of Measurement                                                                                                                                                                                                                                                                                                                      | Quantification                                                                                                                                                                                                                                                                                                                                                                                                                                                                |        |        |     |              |    |                             |    |                                |    |                              |    |                |   |    |
|-------------|--------------------------------|--------------------------------------------------------------------------------------------------------------------------------------------------------------------------------------------------------------------------------------------------------------------------------------------------------------------------------------------|-------------------------------------------------------------------------------------------------------------------------------------------------------------------------------------------------------------------------------------------------------------------------------------------------------------------------------------------------------------------------------------------------------------------------------------------------------------------------------|--------|--------|-----|--------------|----|-----------------------------|----|--------------------------------|----|------------------------------|----|----------------|---|----|
|             | <b>Nicotine exposure</b>       | <p><b>Measurement:</b><br/>Self-reported use of cigarettes.</p> <p><b>Tools:</b><br/>Sociodemographic questionnaire in clinical consultation.</p> <p>Assessment was limited to cigarette smoking, as data on other combustible tobacco products, nicotine delivery systems, or household exposure to tobacco smoke were not available.</p> | <p><b>Metric:</b> Combustible tobacco uses and/or inhaled.</p> <p><b>Scoring:</b></p> <table> <thead> <tr> <th>Points</th> <th>Status</th> </tr> </thead> <tbody> <tr> <td>100</td> <td>Never smoker</td> </tr> <tr> <td>75</td> <td>Former smoker, quit ≥ 5 yrs</td> </tr> <tr> <td>50</td> <td>Former smoker, quit 1 - &lt;5 yrs</td> </tr> <tr> <td>25</td> <td>Former smoker, quit &lt; 1 year</td> </tr> <tr> <td>0</td> <td>Current smoker</td> </tr> </tbody> </table> | Points | Status | 100 | Never smoker | 75 | Former smoker, quit ≥ 5 yrs | 50 | Former smoker, quit 1 - <5 yrs | 25 | Former smoker, quit < 1 year | 0  | Current smoker |   |    |
| Points      | Status                         |                                                                                                                                                                                                                                                                                                                                            |                                                                                                                                                                                                                                                                                                                                                                                                                                                                               |        |        |     |              |    |                             |    |                                |    |                              |    |                |   |    |
| 100         | Never smoker                   |                                                                                                                                                                                                                                                                                                                                            |                                                                                                                                                                                                                                                                                                                                                                                                                                                                               |        |        |     |              |    |                             |    |                                |    |                              |    |                |   |    |
| 75          | Former smoker, quit ≥ 5 yrs    |                                                                                                                                                                                                                                                                                                                                            |                                                                                                                                                                                                                                                                                                                                                                                                                                                                               |        |        |     |              |    |                             |    |                                |    |                              |    |                |   |    |
| 50          | Former smoker, quit 1 - <5 yrs |                                                                                                                                                                                                                                                                                                                                            |                                                                                                                                                                                                                                                                                                                                                                                                                                                                               |        |        |     |              |    |                             |    |                                |    |                              |    |                |   |    |
| 25          | Former smoker, quit < 1 year   |                                                                                                                                                                                                                                                                                                                                            |                                                                                                                                                                                                                                                                                                                                                                                                                                                                               |        |        |     |              |    |                             |    |                                |    |                              |    |                |   |    |
| 0           | Current smoker                 |                                                                                                                                                                                                                                                                                                                                            |                                                                                                                                                                                                                                                                                                                                                                                                                                                                               |        |        |     |              |    |                             |    |                                |    |                              |    |                |   |    |
|             | <b>Sleep health</b>            | <p><b>Measurement:</b><br/>Self-reported average hours of sleep per night.</p> <p><b>Tools:</b><br/>PSQI [8, 9].</p> <p>Sleep duration was calculated by subtracting time to fall asleep (item 2) from time in bed, which was derived by subtracting wake-up time (item 3) from bedtime (item 1).</p>                                      | <p><b>Metric:</b> Average hours of sleep per night.</p> <p><b>Scoring:</b></p> <table> <thead> <tr> <th>Points</th> <th>Level</th> </tr> </thead> <tbody> <tr> <td>100</td> <td>7 to 9</td> </tr> <tr> <td>90</td> <td>9 to &lt;10</td> </tr> <tr> <td>70</td> <td>6 to &lt;7</td> </tr> <tr> <td>40</td> <td>5 to &lt;6 or ≥10</td> </tr> <tr> <td>20</td> <td>4 to &lt;5</td> </tr> <tr> <td>0</td> <td>&lt;4</td> </tr> </tbody> </table>                                  | Points | Level  | 100 | 7 to 9       | 90 | 9 to <10                    | 70 | 6 to <7                        | 40 | 5 to <6 or ≥10               | 20 | 4 to <5        | 0 | <4 |
| Points      | Level                          |                                                                                                                                                                                                                                                                                                                                            |                                                                                                                                                                                                                                                                                                                                                                                                                                                                               |        |        |     |              |    |                             |    |                                |    |                              |    |                |   |    |
| 100         | 7 to 9                         |                                                                                                                                                                                                                                                                                                                                            |                                                                                                                                                                                                                                                                                                                                                                                                                                                                               |        |        |     |              |    |                             |    |                                |    |                              |    |                |   |    |
| 90          | 9 to <10                       |                                                                                                                                                                                                                                                                                                                                            |                                                                                                                                                                                                                                                                                                                                                                                                                                                                               |        |        |     |              |    |                             |    |                                |    |                              |    |                |   |    |
| 70          | 6 to <7                        |                                                                                                                                                                                                                                                                                                                                            |                                                                                                                                                                                                                                                                                                                                                                                                                                                                               |        |        |     |              |    |                             |    |                                |    |                              |    |                |   |    |
| 40          | 5 to <6 or ≥10                 |                                                                                                                                                                                                                                                                                                                                            |                                                                                                                                                                                                                                                                                                                                                                                                                                                                               |        |        |     |              |    |                             |    |                                |    |                              |    |                |   |    |
| 20          | 4 to <5                        |                                                                                                                                                                                                                                                                                                                                            |                                                                                                                                                                                                                                                                                                                                                                                                                                                                               |        |        |     |              |    |                             |    |                                |    |                              |    |                |   |    |
| 0           | <4                             |                                                                                                                                                                                                                                                                                                                                            |                                                                                                                                                                                                                                                                                                                                                                                                                                                                               |        |        |     |              |    |                             |    |                                |    |                              |    |                |   |    |

**Table S1** Definition, tools and scoring approach for quantifying Life's Essential 8 scores

| LE8 Domains    | LE8 Components         | Method of Measurement                                                                                                                                                                                                                                                                                                         | Quantification                                                                                                                                                                                                                                                                                                                                                                                                                                                |        |       |     |      |    |             |    |             |    |             |   |      |
|----------------|------------------------|-------------------------------------------------------------------------------------------------------------------------------------------------------------------------------------------------------------------------------------------------------------------------------------------------------------------------------|---------------------------------------------------------------------------------------------------------------------------------------------------------------------------------------------------------------------------------------------------------------------------------------------------------------------------------------------------------------------------------------------------------------------------------------------------------------|--------|-------|-----|------|----|-------------|----|-------------|----|-------------|---|------|
| Health Factors | <b>Body Mass Index</b> | <p><b>Measurement:</b><br/>Body weight (kg) divided by height squared (m<sup>2</sup>).</p> <p><b>Tools:</b><br/>Height was measured without shoes using a stadiometer (Charter Medical, model HM200P), and weight was assessed using the InBody 770 device, with participants wearing light indoor clothing and no shoes.</p> | <p><b>Metric:</b> BMI (kg/m<sup>2</sup>).</p> <p><b>Scoring:</b></p> <table border="1"> <thead> <tr> <th>Points</th> <th>Level</th> </tr> </thead> <tbody> <tr> <td>100</td> <td>&lt;25</td> </tr> <tr> <td>70</td> <td>25 to &lt;30</td> </tr> <tr> <td>30</td> <td>30 to &lt;35</td> </tr> <tr> <td>15</td> <td>35 to &lt;40</td> </tr> <tr> <td>0</td> <td>≥40</td> </tr> </tbody> </table>                                                                | Points | Level | 100 | <25  | 70 | 25 to <30   | 30 | 30 to <35   | 15 | 35 to <40   | 0 | ≥40  |
|                | Points                 | Level                                                                                                                                                                                                                                                                                                                         |                                                                                                                                                                                                                                                                                                                                                                                                                                                               |        |       |     |      |    |             |    |             |    |             |   |      |
| 100            | <25                    |                                                                                                                                                                                                                                                                                                                               |                                                                                                                                                                                                                                                                                                                                                                                                                                                               |        |       |     |      |    |             |    |             |    |             |   |      |
| 70             | 25 to <30              |                                                                                                                                                                                                                                                                                                                               |                                                                                                                                                                                                                                                                                                                                                                                                                                                               |        |       |     |      |    |             |    |             |    |             |   |      |
| 30             | 30 to <35              |                                                                                                                                                                                                                                                                                                                               |                                                                                                                                                                                                                                                                                                                                                                                                                                                               |        |       |     |      |    |             |    |             |    |             |   |      |
| 15             | 35 to <40              |                                                                                                                                                                                                                                                                                                                               |                                                                                                                                                                                                                                                                                                                                                                                                                                                               |        |       |     |      |    |             |    |             |    |             |   |      |
| 0              | ≥40                    |                                                                                                                                                                                                                                                                                                                               |                                                                                                                                                                                                                                                                                                                                                                                                                                                               |        |       |     |      |    |             |    |             |    |             |   |      |
|                | <b>Blood lipids</b>    | <p><b>Measurement:</b><br/>Total Plasma and HDL-cholesterol calculation of non-HDL-cholesterol.</p> <p><b>Tools:</b><br/>Fasting blood sample.<br/>The use of lipid-lowering medications was determined through a medication review by the study staff.</p>                                                                   | <p><b>Metric:</b> Non-HDL-cholesterol (mg/dL).</p> <p><b>Scoring:</b></p> <table border="1"> <thead> <tr> <th>Points</th> <th>Level</th> </tr> </thead> <tbody> <tr> <td>100</td> <td>&lt;130</td> </tr> <tr> <td>60</td> <td>130 to &lt;160</td> </tr> <tr> <td>40</td> <td>160 to &lt;189</td> </tr> <tr> <td>20</td> <td>190 to &lt;220</td> </tr> <tr> <td>0</td> <td>≥220</td> </tr> </tbody> </table> <p>If drug-treated level, subtract 20 points.</p> | Points | Level | 100 | <130 | 60 | 130 to <160 | 40 | 160 to <189 | 20 | 190 to <220 | 0 | ≥220 |
| Points         | Level                  |                                                                                                                                                                                                                                                                                                                               |                                                                                                                                                                                                                                                                                                                                                                                                                                                               |        |       |     |      |    |             |    |             |    |             |   |      |
| 100            | <130                   |                                                                                                                                                                                                                                                                                                                               |                                                                                                                                                                                                                                                                                                                                                                                                                                                               |        |       |     |      |    |             |    |             |    |             |   |      |
| 60             | 130 to <160            |                                                                                                                                                                                                                                                                                                                               |                                                                                                                                                                                                                                                                                                                                                                                                                                                               |        |       |     |      |    |             |    |             |    |             |   |      |
| 40             | 160 to <189            |                                                                                                                                                                                                                                                                                                                               |                                                                                                                                                                                                                                                                                                                                                                                                                                                               |        |       |     |      |    |             |    |             |    |             |   |      |
| 20             | 190 to <220            |                                                                                                                                                                                                                                                                                                                               |                                                                                                                                                                                                                                                                                                                                                                                                                                                               |        |       |     |      |    |             |    |             |    |             |   |      |
| 0              | ≥220                   |                                                                                                                                                                                                                                                                                                                               |                                                                                                                                                                                                                                                                                                                                                                                                                                                               |        |       |     |      |    |             |    |             |    |             |   |      |

**Table S1** Definition, tools and scoring approach for quantifying Life's Essential 8 scores

| LE8 Domains | LE8 Components                                                    | Method of Measurement                                                                                                                                                                                                                                                                                                                                                        | Quantification                                                                                                                                                                                                                                                                                                                                                                                                                                                                                                                                                                                                                                                                                                                            |        |       |     |                                                     |    |                                                                   |    |                          |    |                                  |    |                                  |    |                                   |   |                            |
|-------------|-------------------------------------------------------------------|------------------------------------------------------------------------------------------------------------------------------------------------------------------------------------------------------------------------------------------------------------------------------------------------------------------------------------------------------------------------------|-------------------------------------------------------------------------------------------------------------------------------------------------------------------------------------------------------------------------------------------------------------------------------------------------------------------------------------------------------------------------------------------------------------------------------------------------------------------------------------------------------------------------------------------------------------------------------------------------------------------------------------------------------------------------------------------------------------------------------------------|--------|-------|-----|-----------------------------------------------------|----|-------------------------------------------------------------------|----|--------------------------|----|----------------------------------|----|----------------------------------|----|-----------------------------------|---|----------------------------|
|             | <b>Blood glucose</b>                                              | <p><b>Measurement:</b><br/>Fasting blood glucose and casual hemoglobin A1c.</p> <p><b>Tools:</b><br/>Fasting blood sample.<br/>Individuals with elevated fasting glucose levels (&gt;125 mg/dL) or elevated HbA1c (&gt;6.4%) without a history of diabetes are treated as cases of undiagnosed diabetes and included in the diabetes group, as described elsewhere [10].</p> | <p><b>Metric:</b> Fasting blood glucose (mg/dL) or Hemoglobin A1c (%).</p> <p><b>Scoring:</b></p> <table border="1"> <thead> <tr> <th>Points</th> <th>Level</th> </tr> </thead> <tbody> <tr> <td>100</td> <td>No history of diabetes and FBG &lt;100 (or HbA1c &lt;5.7)</td> </tr> <tr> <td>60</td> <td>No diabetes and FBG 100 - 125 (or HbA1c 5.7 - 6.4) (pre-diabetes)</td> </tr> <tr> <td>40</td> <td>Diabetes with HbA1c &lt;7.0</td> </tr> <tr> <td>30</td> <td>Diabetes with HbA1c 7.0 to &lt; 8.0</td> </tr> <tr> <td>20</td> <td>Diabetes with HbA1c 8.0 to &lt; 9.0</td> </tr> <tr> <td>10</td> <td>Diabetes with HbA1c 9.0 to &lt; 10.0</td> </tr> <tr> <td>0</td> <td>Diabetes with HbA1c ≥ 10.0</td> </tr> </tbody> </table> | Points | Level | 100 | No history of diabetes and FBG <100 (or HbA1c <5.7) | 60 | No diabetes and FBG 100 - 125 (or HbA1c 5.7 - 6.4) (pre-diabetes) | 40 | Diabetes with HbA1c <7.0 | 30 | Diabetes with HbA1c 7.0 to < 8.0 | 20 | Diabetes with HbA1c 8.0 to < 9.0 | 10 | Diabetes with HbA1c 9.0 to < 10.0 | 0 | Diabetes with HbA1c ≥ 10.0 |
| Points      | Level                                                             |                                                                                                                                                                                                                                                                                                                                                                              |                                                                                                                                                                                                                                                                                                                                                                                                                                                                                                                                                                                                                                                                                                                                           |        |       |     |                                                     |    |                                                                   |    |                          |    |                                  |    |                                  |    |                                   |   |                            |
| 100         | No history of diabetes and FBG <100 (or HbA1c <5.7)               |                                                                                                                                                                                                                                                                                                                                                                              |                                                                                                                                                                                                                                                                                                                                                                                                                                                                                                                                                                                                                                                                                                                                           |        |       |     |                                                     |    |                                                                   |    |                          |    |                                  |    |                                  |    |                                   |   |                            |
| 60          | No diabetes and FBG 100 - 125 (or HbA1c 5.7 - 6.4) (pre-diabetes) |                                                                                                                                                                                                                                                                                                                                                                              |                                                                                                                                                                                                                                                                                                                                                                                                                                                                                                                                                                                                                                                                                                                                           |        |       |     |                                                     |    |                                                                   |    |                          |    |                                  |    |                                  |    |                                   |   |                            |
| 40          | Diabetes with HbA1c <7.0                                          |                                                                                                                                                                                                                                                                                                                                                                              |                                                                                                                                                                                                                                                                                                                                                                                                                                                                                                                                                                                                                                                                                                                                           |        |       |     |                                                     |    |                                                                   |    |                          |    |                                  |    |                                  |    |                                   |   |                            |
| 30          | Diabetes with HbA1c 7.0 to < 8.0                                  |                                                                                                                                                                                                                                                                                                                                                                              |                                                                                                                                                                                                                                                                                                                                                                                                                                                                                                                                                                                                                                                                                                                                           |        |       |     |                                                     |    |                                                                   |    |                          |    |                                  |    |                                  |    |                                   |   |                            |
| 20          | Diabetes with HbA1c 8.0 to < 9.0                                  |                                                                                                                                                                                                                                                                                                                                                                              |                                                                                                                                                                                                                                                                                                                                                                                                                                                                                                                                                                                                                                                                                                                                           |        |       |     |                                                     |    |                                                                   |    |                          |    |                                  |    |                                  |    |                                   |   |                            |
| 10          | Diabetes with HbA1c 9.0 to < 10.0                                 |                                                                                                                                                                                                                                                                                                                                                                              |                                                                                                                                                                                                                                                                                                                                                                                                                                                                                                                                                                                                                                                                                                                                           |        |       |     |                                                     |    |                                                                   |    |                          |    |                                  |    |                                  |    |                                   |   |                            |
| 0           | Diabetes with HbA1c ≥ 10.0                                        |                                                                                                                                                                                                                                                                                                                                                                              |                                                                                                                                                                                                                                                                                                                                                                                                                                                                                                                                                                                                                                                                                                                                           |        |       |     |                                                     |    |                                                                   |    |                          |    |                                  |    |                                  |    |                                   |   |                            |
|             | <b>Blood pressure</b>                                             | <p><b>Measurement:</b><br/>Maximum average blood pressure (right/left arm) of the last 2 repetitions out of a total of 3, as described elsewhere [11].</p> <p><b>Tools:</b><br/>Omron M6 Comfort (HEM-7360-E).</p>                                                                                                                                                           | <p><b>Metric:</b> Systolic and diastolic blood pressure (mmHg).</p> <p><b>Scoring:</b></p> <table border="1"> <thead> <tr> <th>Points</th> <th>Level</th> </tr> </thead> <tbody> <tr> <td>100</td> <td>&lt;120 / &lt;80</td> </tr> <tr> <td>75</td> <td>120 - 129 / &lt;80</td> </tr> <tr> <td>50</td> <td>130 - 139 or 80 - 89</td> </tr> <tr> <td>25</td> <td>140 - 159 or 90 - 99</td> </tr> <tr> <td>0</td> <td>≥160 or ≥100</td> </tr> </tbody> </table> <p>If drug-treated level, subtract 20 points.</p>                                                                                                                                                                                                                           | Points | Level | 100 | <120 / <80                                          | 75 | 120 - 129 / <80                                                   | 50 | 130 - 139 or 80 - 89     | 25 | 140 - 159 or 90 - 99             | 0  | ≥160 or ≥100                     |    |                                   |   |                            |
| Points      | Level                                                             |                                                                                                                                                                                                                                                                                                                                                                              |                                                                                                                                                                                                                                                                                                                                                                                                                                                                                                                                                                                                                                                                                                                                           |        |       |     |                                                     |    |                                                                   |    |                          |    |                                  |    |                                  |    |                                   |   |                            |
| 100         | <120 / <80                                                        |                                                                                                                                                                                                                                                                                                                                                                              |                                                                                                                                                                                                                                                                                                                                                                                                                                                                                                                                                                                                                                                                                                                                           |        |       |     |                                                     |    |                                                                   |    |                          |    |                                  |    |                                  |    |                                   |   |                            |
| 75          | 120 - 129 / <80                                                   |                                                                                                                                                                                                                                                                                                                                                                              |                                                                                                                                                                                                                                                                                                                                                                                                                                                                                                                                                                                                                                                                                                                                           |        |       |     |                                                     |    |                                                                   |    |                          |    |                                  |    |                                  |    |                                   |   |                            |
| 50          | 130 - 139 or 80 - 89                                              |                                                                                                                                                                                                                                                                                                                                                                              |                                                                                                                                                                                                                                                                                                                                                                                                                                                                                                                                                                                                                                                                                                                                           |        |       |     |                                                     |    |                                                                   |    |                          |    |                                  |    |                                  |    |                                   |   |                            |
| 25          | 140 - 159 or 90 - 99                                              |                                                                                                                                                                                                                                                                                                                                                                              |                                                                                                                                                                                                                                                                                                                                                                                                                                                                                                                                                                                                                                                                                                                                           |        |       |     |                                                     |    |                                                                   |    |                          |    |                                  |    |                                  |    |                                   |   |                            |
| 0           | ≥160 or ≥100                                                      |                                                                                                                                                                                                                                                                                                                                                                              |                                                                                                                                                                                                                                                                                                                                                                                                                                                                                                                                                                                                                                                                                                                                           |        |       |     |                                                     |    |                                                                   |    |                          |    |                                  |    |                                  |    |                                   |   |                            |

CVH: Cardiovascular Health; FBG: fasting blood glucose; FFQ: Food Frequency Questionnaire; HEI-2020: Healthy Eating Index 2020; GPAQ: Global Physical Activity Questionnaire; HbA1c: hemoglobin A1c; HDL: high-density lipoprotein; PSQI: Pittsburgh Sleep Quality Index.

**Table S2** Description of psychosocial variables and dichotomous classifications

| Variable                   | Assessment tool or survey question                                                                                                                              | Classification of possible answers into dichotomous variables                                                                                                                                                                                                                                                                       |
|----------------------------|-----------------------------------------------------------------------------------------------------------------------------------------------------------------|-------------------------------------------------------------------------------------------------------------------------------------------------------------------------------------------------------------------------------------------------------------------------------------------------------------------------------------|
| <b>Economic Status</b>     | "Currently, and in relation to your household's total monthly net income, how do you usually manage to make ends meet?"                                         | <ul style="list-style-type: none"> <li>• <b>Financial ease:</b> "With some ease", "With ease", "With great ease"</li> <li>• <b>Financial hardship:</b> "With great difficulty", "With difficulty", "With some difficulty"</li> </ul>                                                                                                |
| <b>Net Income</b>          | "Could you tell me which of the following ranges best represents your household's total monthly net income, after deductions for taxes, social security, etc.?" | <ul style="list-style-type: none"> <li>• <b>Below the minimum wage:</b> "Less than 650 euros per month", "Between 650 and 1,000 euros per month"</li> <li>• <b>At or above the minimum wage:</b> "Between 1,001 and 2,000 euros per month", "Between 2,001 and 3,000 euros per month", "More than 3,001 euros per month"</li> </ul> |
| <b>Educational level</b>   | "What studies have you completed? Please add up all the years of formal education you have finished."                                                           | <p>Possible answers are whole numbers (e.g., 0-20+).</p> <ul style="list-style-type: none"> <li>• <b>"12 years of education or less"</b> (typically corresponds to secondary education or below)</li> <li>• <b>"More than 12 years of education"</b> (typically indicates post-secondary or higher education)</li> </ul>            |
| <b>Marital Status</b>      | "What is your marital status?"                                                                                                                                  | <ul style="list-style-type: none"> <li>• <b>In a relationship:</b> "Married or with partner"</li> <li>• <b>Not in a relationship:</b> "Single", "Widowed (not in a relationship)", "Legally separated or divorced (not in a relationship)"</li> </ul>                                                                               |
| <b>Health Perception</b>   | "In the past twelve months, would you say your health has been very good, good, fair, poor, or very poor?" [12].                                                | <ul style="list-style-type: none"> <li>• <b>Poor-Fair:</b> "Fair", "Poor", "Very poor"</li> <li>• <b>Good:</b> "Very good", "Good"</li> </ul>                                                                                                                                                                                       |
| <b>Depressive symptoms</b> | <i>Beck Depression Inventory-II (BDI-II)</i> [13].                                                                                                              | <p>Responses were classified according to BDI-II total scores.</p> <ul style="list-style-type: none"> <li>• <b>No depressive state:</b> score &lt; 14 points</li> <li>• <b>Depressive symptoms:</b> score ≥ 14 points</li> </ul>                                                                                                    |

Description of psychosocial variables, assessment tools, and their dichotomous classification used in the analysis. BDI-II: Beck Depression Inventory-II

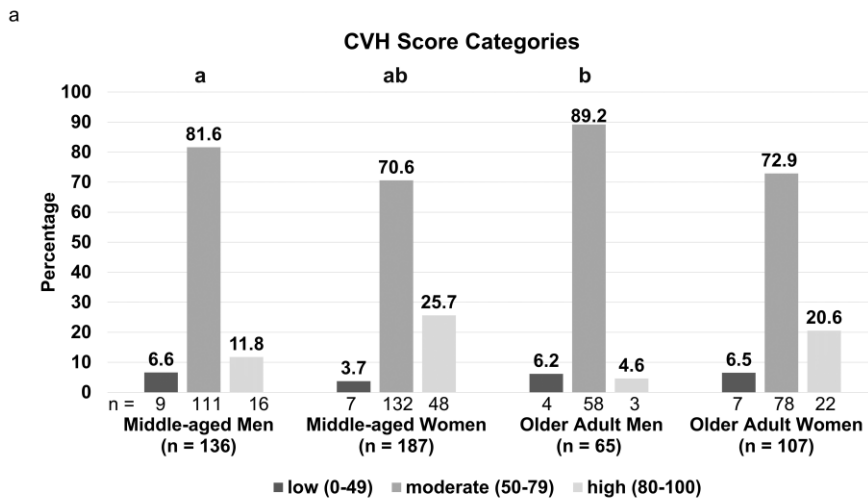

**Fig. S1** Overall CVH, Health Factors, and Health Behaviors categories by age and sex. CVH (a), Health factors (b) and Health behaviors (c) score categories by Age and Sex combined. Significant differences between groups indicated by “a”, “b”, and “c”. CVH: Cardiovascular Health

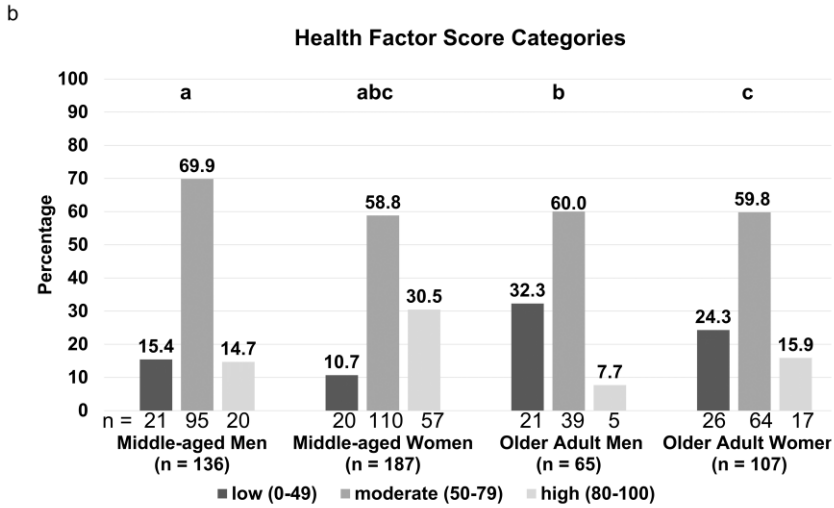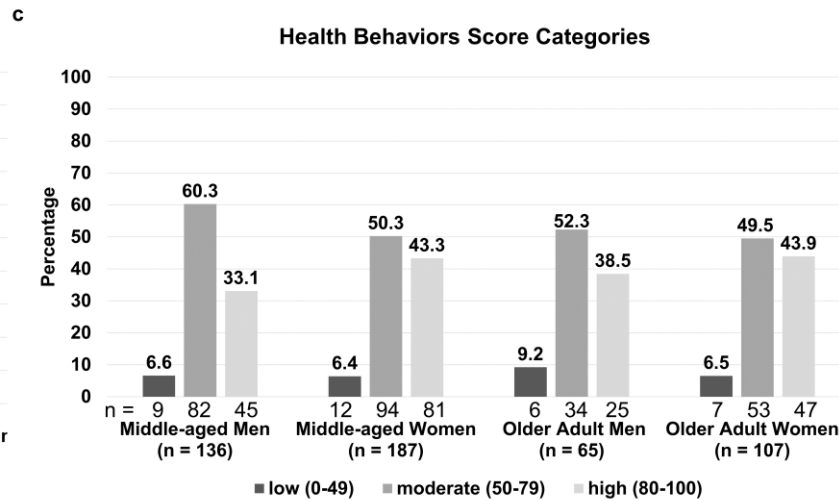

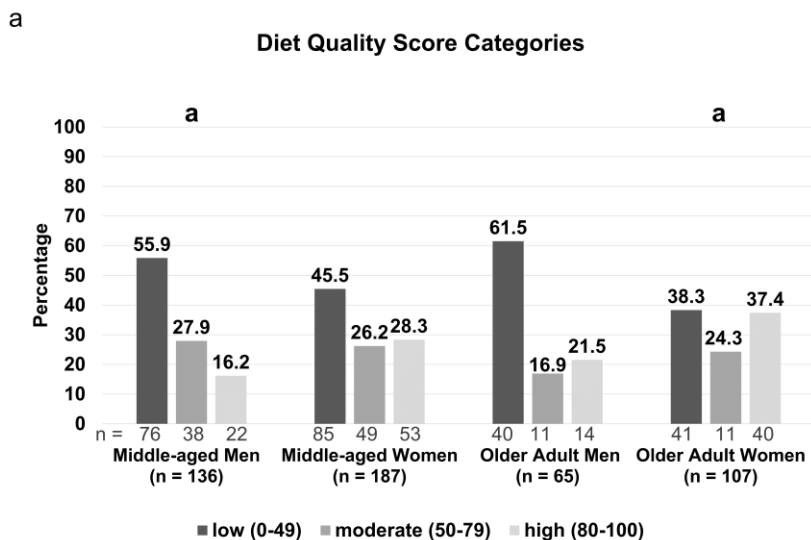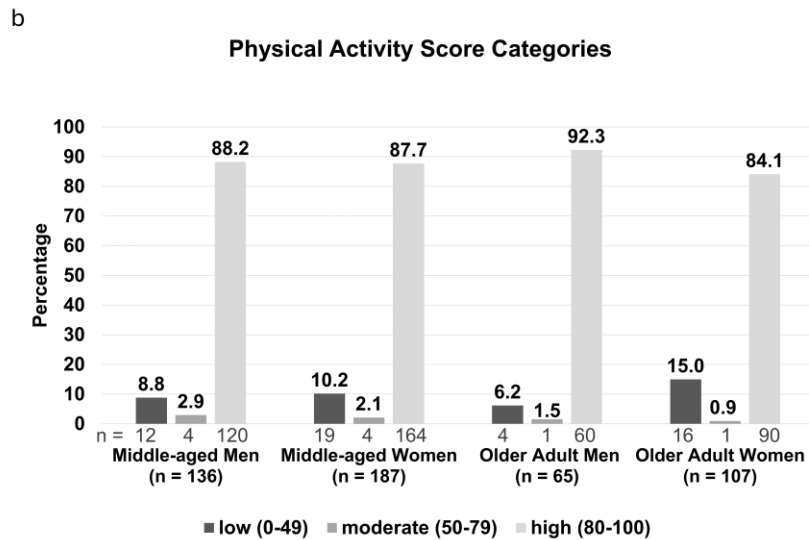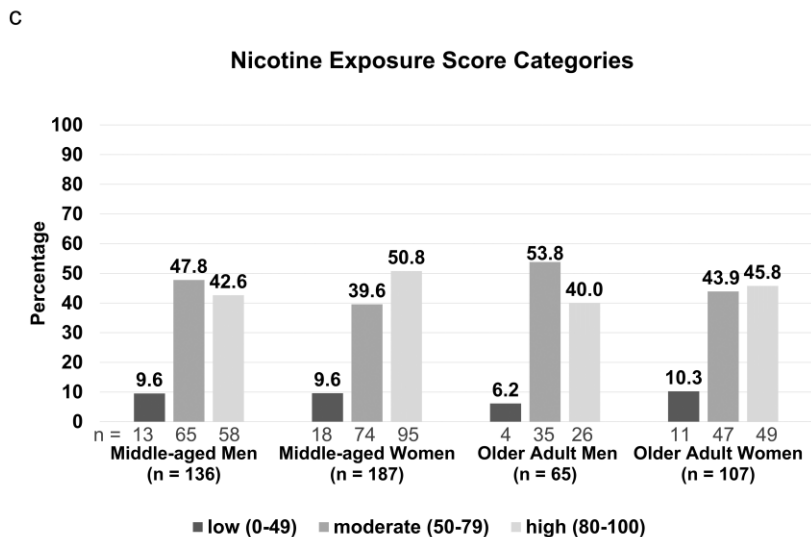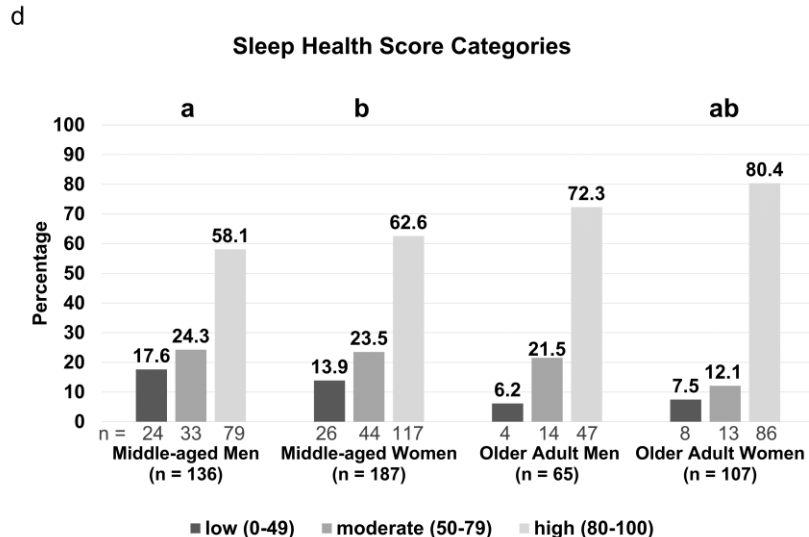

**Fig. S2** Health behavior components score categories by age and sex. (a) Diet Quality. (b) Physical Activity. (c) Nicotine Exposure. (d) Sleep Health. Significant differences between groups indicated by “a”, “b”, and “c”

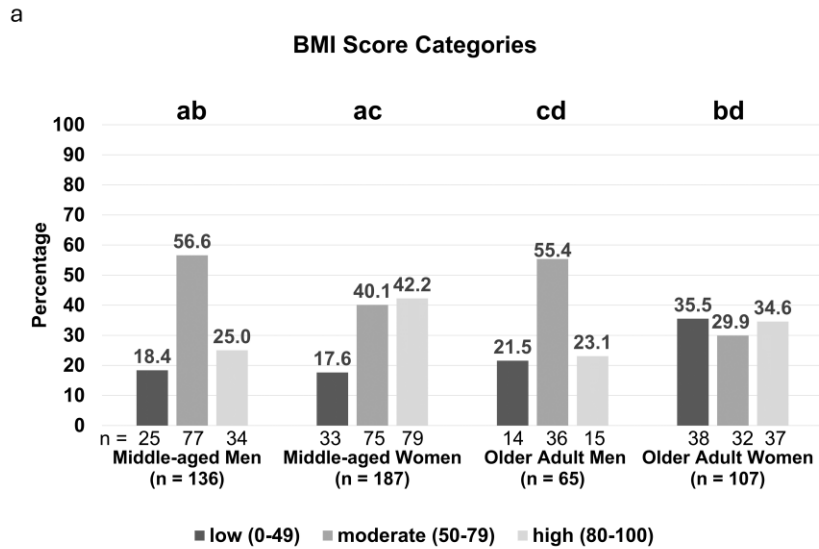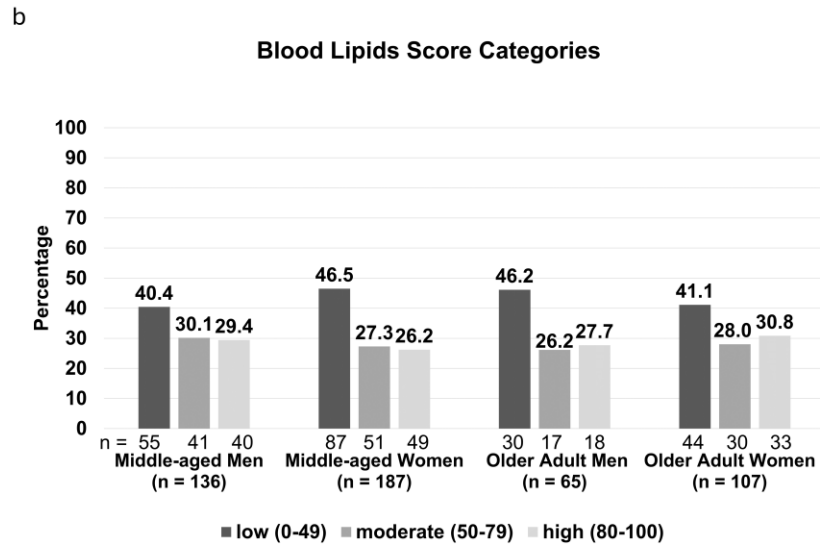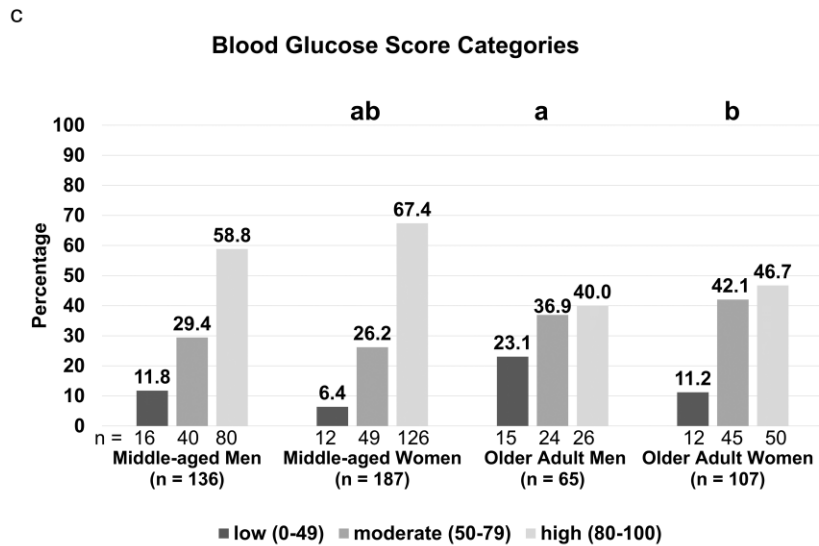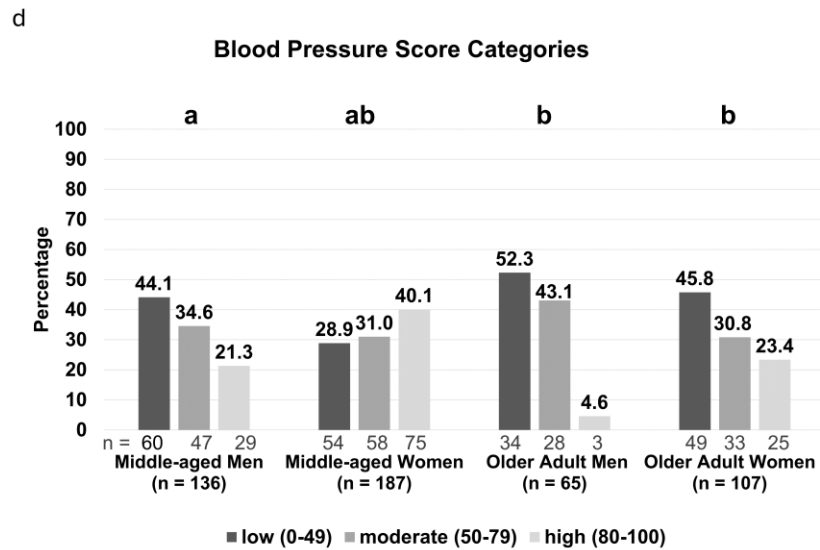

**Fig. S3** Health factor components score categories by age and sex. (a) BMI. (b) Blood Lipids, (c) Blood Glucose, (d) Blood Pressure. Significant differences between groups indicated by “a”, “b”, “c” and “d”. BMI: Body Mass Index.

## References

1. Shams-White MM, Pannucci TRE, Lerman JL, et al (2023) Healthy Eating Index-2020: Review and Update Process to Reflect the Dietary Guidelines for Americans, 2020-2025. *J Acad Nutr Diet* 123:1280–1288. <https://doi.org/10.1016/j.jand.2023.05.015>
2. Martín-moreno JM, Boyle P, Gorgojo L, et al (1993) Development and validation of a food frequency questionnaire in Spain. *Int J Epidemiol* 22:512–519. <https://doi.org/10.1093/ije/22.3.512>
3. Fernández-Ballart JD, Piñol JL, Zazpe I, et al (2010) Relative validity of a semi-quantitative food-frequency questionnaire in an elderly Mediterranean population of Spain. *Br J Nutr* 103:1808–1816. <https://doi.org/10.1017/s0007114509993837>
4. Verdú FJM, Navarro SZ (2009) Tablas de composición de alimentos
5. Moreiras O, Others (2019) Tablas de composición de alimentos
6. Moreiras O, Carbajal A, Cabrera L (2005) Tablas de Composición de Alimentos. Tablas de Composición de Alimentos Pirámide
7. Bull FC, Maslin TS, Armstrong T (2009) Global physical activity questionnaire (GPAQ): Nine country reliability and validity study. *J Phys Act Health* 6:790–804. <https://doi.org/10.1123/jpah.6.6.790>
8. Buysse DJ, Reynolds CF, Monk TH, et al (1989) The Pittsburgh Sleep Quality Index: a new instrument for psychiatric practice and research. *Psychiatry Res* 28:193–213. [https://doi.org/10.1016/0165-1781\(89\)90047-4](https://doi.org/10.1016/0165-1781(89)90047-4)
9. Rico AR (1997) Estudio de calidad de sueño en población general y pacientes psiquiátricos mediante el cuestionario de Pittsburgh. Universidad de Valladolid
10. Huang H, Wang J, Dunk MM, et al (2024) Association of Cardiovascular Health With Brain Age Estimated Using Machine Learning Methods in Middle-Aged and Older Adults. *Neurology* 103:. <https://doi.org/10.1212/WNL.000000000209530>
11. Higuera-Fresnillo S, Herraiz-Adillo Á, Ahlqvist VH, et al (2023) Low prevalence of ideal cardiovascular health in the general Swedish population: Results from the Swedish CArdioPulmonary biolmage Study (SCAPIS). *Scand J Public Health* 51:527–530. <https://doi.org/10.1177/14034948221147093>
12. Ministerio de Sanidad, Consumo y Bienestar Social (2017) Encuesta Nacional de Salud de España (2017). Cuestionario de Adultos
13. Sanz J, Perdigón AL, Vázquez C (2003) Adaptación española del Inventario para la Depresión de Beck-II (BDI-II): 2. Propiedades psicométricas en población general. *Clin Salud* 14:249–280
